# Supplementary material for: Adaptation and compensation in a bacterial gene regulatory network evolving under antibiotic selection
Source: eLife. 2021 Sep 30;10:e70931. doi: 10.7554/eLife.70931 (PMC8483737; doi:10.7554/eLife.70931)
Supplement: Supplementary file 1. [file elife-70931-supp1.xlsx]

## Sheet: 21 generations
			Frequency in Lineage
Locus	Description	Mutation	A	B	C
mgrB	PhoQ kinase inhibitor	IS5:: -46	0.33	0.825	0.625
		ΔA:+99	0.453	-	-

## Sheet: 105 generations
		TMP-resistant isolates
Locus	Description	A1	A2	A3	A4	A5
folA	dihydrofolate reductase	Trp30Arg	Trp30Arg	Trp30Arg	Trp30Arg	Trp30Arg
murE	UDP-N-acetylmuramoyl-L-alanyl-D-glutamate—2,6-diaminopimelate ligase	Asp16Glu	Asp16Glu	Asp16Glu	Asp16Glu	Asp16Glu
ecpC	fimbrial usher protein	Val786Met	Val786Met	Val786Met	Val786Met	Val786Met
folD	bifunctional methylenetetrahydrofolate dehydrogenase / methenyltetrahydrofolate cyclohydrolase	Asp284Asp	Asp284Asp	Asp284Asp	Asp284Asp	Asp284Asp
safA	two-component system connector	Leu63Ser	Leu63Ser	Leu63Ser	Leu63Ser	Leu63Ser
baeS	sensor histidine kinase	Asn74Asp	Asn74Asp	Asn74Asp	Asn74Asp	Asn74Asp
dnaA	chromosomal replication initiator protein	Asp269Gly	Asp269Gly	Asp269Gly	Asp269Gly	Asp269Gly
deoA	thymidine phosphorylase	Ala414Val	-	A::+1242	-	-
mgrB	PhoQ kinase inhibitor	IS5:: -46	IS5:: -46	IS5:: -46	IS5:: -46	IS5:: -46

## Sheet: 147 generations
		TMP-resistant isolates
Locus	Description	A7	A8	A9	A10	A11	A12
folA	dihydrofolate reductase	-	-	-	Trp30Gly	Trp30Arg	Ile94Leu
murE	UDP-N-acetylmuramoyl-L-alanyl-D-glutamate—2,6-diaminopimelate ligase	-	-	-	-	Asp16Glu	-
ecpC	fimbrial usher protein	Val786Met	Val786Met	Val786Met	Val786Met	Val786Met	Val786Met
folD	bifunctional methylenetetrahydrofolate dehydrogenase / methenyltetrahydrofolate cyclohydrolase	-	-	-	-	Asp284Asp	-
safA	two-component system connector	-	-	-	-	Leu63Ser	-
baeS	sensor histidine kinase	Asn74Asp	Asn74Asp	Asn74Asp	Asn74Asp	Asn74Asp	Asn74Asp
dnaA	chromosomal replication initiator protein	Asp269Gly	Asp269Gly	Asp269Gly	Asp269Gly	Asp269Gly	Asp269Gly
glnD	thymidine phosphorylase	-	Thr809Pro	-	-	-	-
frdA	fumarate reductase flavoprotein subunit	-	-	-	-	-	Thr95Pro
hisB	imidazoleglycerol-phosphate dehydratase / histidinol-phosphatase	Asp206Val	-	-	-	-	-
zraS	sensor histidine kinase	Val298Gly	-	-	-	-	-
lipB	lipoyl(octanoyl) transferase	-	Glu175Gly	-	-	-	-
mgrB	PhoQ kinase inhibitor	IS5:: -46	IS5:: -46	IS5:: -46	IS5:: -46	IS5:: -46	IS5:: -46

## Sheet: 350 generations
		TMP-resistant isolates
Locus	Description	A1	A2	A3
folA	dihydrofolate reductase	Trp30Cys	Trp30Gly	Asp27Glu
ecpC	fimbrial usher protein	Val786Met	Val786Met	Val786Met
baeS	sensor histidine kinase	Asn74Asp	Asn74Asp	Asn74Asp
uvrC	excision nuclease subunit C	Tyr136Asp	-	-
dnaA	chromosomal replication initiator protein	Asp269Gly	Asp269Gly	Asp269Gly
rpoS	RNA polymerase, sigma S (sigma 38) factor	Ile128Ser	Ile128Asn	Ile128Asn
mgrB	PhoQ kinase inhibitor	IS5:: -46	IS5:: -46	IS5:: -46
