# Supplementary material for: Adaptation and compensation in a bacterial gene regulatory network evolving under antibiotic selection
Source: eLife. 2021 Sep 30;10:e70931. doi: 10.7554/eLife.70931 (PMC8483737; doi:10.7554/eLife.70931)
Supplement: Supplementary file 2. [file elife-70931-supp2.xlsx]

## Sheet: 147 generations
		TMP-resistant isolates				TMP-tolerant isolates
Locus	Description	A1	A2	A3		SA1	SA2	SA3
folA	dihydrofolate reductase	C-35T	C-35T	C-35T		-	-	-
mgrB	PhoQ kinase inhibitor	ΔA::+98	ΔA::+98	ΔA::+98		IS5:: -46	IS5:: -46	IS5:: -46
deoA		A::+1242	-	-		-	-	-
rpoS	RNA polymerase, sigma S (sigma 38) factor	-	-	-		Ile128Asn	Ile128Ser	Ile128Asn
kdsC	3-deoxy-D-manno-octulosonate 8-phosphate phosphatase	-	-	-		-	-	Gly161Ala
yhcF	DUF1120 domain-containing protein	-	-	-		Asp92Gly	-	-

## Sheet: 350 generations
		TMP-resistant isolates				TMP-tolerant isolates
Locus	Description	A1	A2	A3		SA1	SA2	SA3
folA	dihydrofolate reductase	Trp30Arg	Trp30Arg	Trp30Arg		-	-	-
mgrB	PhoQ kinase inhibitor	IS5:: -46	IS5:: -46	IS5:: -46		IS5:: -46	IS5:: -46	IS5:: -46
deoA		-	-	-		-	-	A::+1242
rpoS	RNA polymerase, sigma S (sigma 38) factor	STOP*331Tyr	STOP*331Tyr	STOP*331Tyr		Ile128Asn	Ile128Asn	Ile128Asn
phoP	DNA-binding transcriptional dual regulator	-	-	-		-	-	Glu186Gly
folD	bifunctional methylenetetrahydrofolate dehydrogenase / methenyltetrahydrofolate cyclohydrolase	-	-	-		Ile221Phe	Ile221Phe	-
