# Supplementary material for: Adaptation and compensation in a bacterial gene regulatory network evolving under antibiotic selection
Source: eLife. 2021 Sep 30;10:e70931. doi: 10.7554/eLife.70931 (PMC8483737; doi:10.7554/eLife.70931)
Supplement: Supplementary file 3. [file elife-70931-supp3.xlsx]

## Sheet: 147 generations
		TMP-resistant isolates
Locus	Description	A1	A2	A3	A4	A5
folA	dihydrofolate reductase	-	-	-	-	-
mgrB	PhoQ kinase inhibitor	A::+88	A::+89	A::+90	A::+91	A::+92
deoA		A::+1242	-	-
rpoS	RNA polymerase, sigma S (sigma 38) factor	Ile128Ser	Ile128Ser	Ile128Ser	Ile128Ser	Ile128Ser
sulA	cell division inhibitor	T-41C	T-41C	T-41C	T-41C	T-41C
arcA	DNA-binding transcriptional dual regulator	Ser119Pro	Ser119Pro	Ser119Pro	-	Ser119Pro
16S rRNA	16S ribosomal RNA	A205G	A205G	A205G	A205G	A205G

## Sheet: 350 generations
		TMP-resistant isolates
Locus	Description	A1	A2	A3
folA	dihydrofolate reductase	-	-	-
mgrB	PhoQ kinase inhibitor	A::+88	A::+89	A::+90
deoA		A::+1242	-	-
rpoS	RNA polymerase, sigma S (sigma 38) factor	Ile128Ser	Ile128Ser	Ile128Ser
sulA	cell division inhibitor	T-41C	T-41C	T-41C
arcA	DNA-binding transcriptional dual regulator	Ser119Pro	Ser119Pro	Ser119Pro
16S rRNA	16S ribosomal RNA	A205G	A205G	A205G
rstB	sensory histidine kinase	-	-	Asp381Gly
5S rRNA	5S ribosomal RNA	C2T	-	-
leuS	leucine—tRNA ligase	G-52T	-	-
ymfD	putative SAM-dependent methyltransferase	-	Val2Ala	-
